# Supplementary material for: Core-Shell Nanostructure ofα-Fe2O3/Fe3O4: Synthesis and Photocatalysis for Methyl Orange
Source: Hindawi journal article supplement (doi:10.1155/2011/837123), 2010-08-11

# Supporting Information

## Core-shell Nanostructure of $\alpha$ -Fe<sub>2</sub>O<sub>3</sub>/Fe<sub>3</sub>O<sub>4</sub>: Synthesis and Photocatalysis for Methyl Orange

Figure S1. XRD of the oxidization product for Sample 2 (a) and Sample 4 (b).

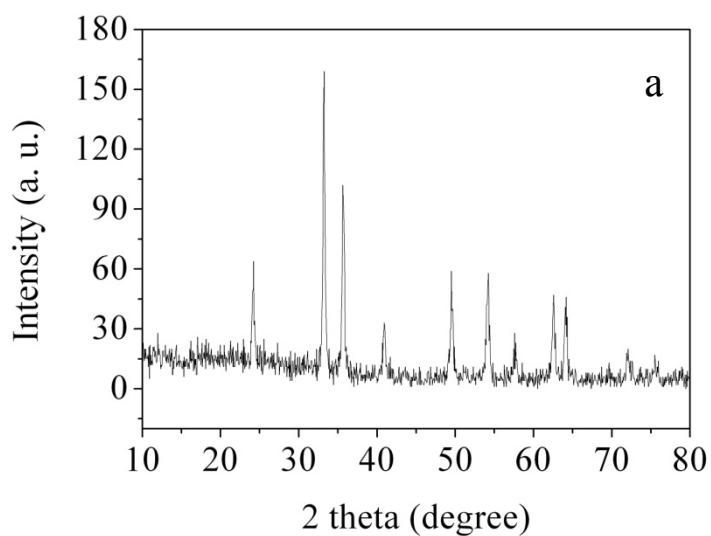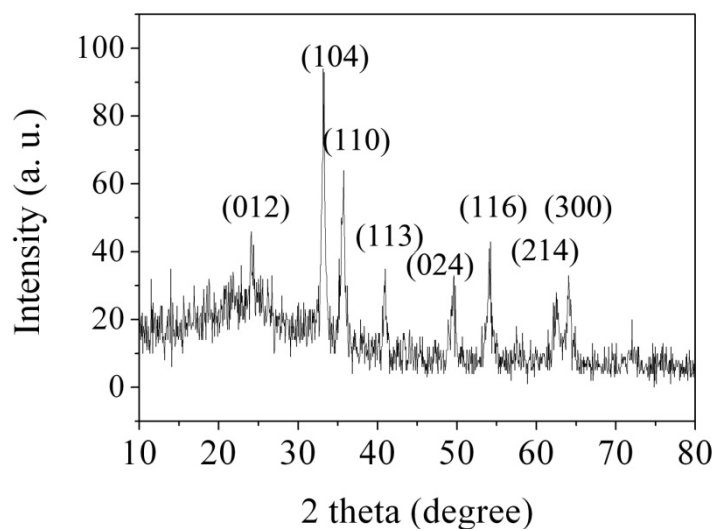

Figure S2. XRD of the prepared Fe<sub>3</sub>O<sub>4</sub> for Sample 1 (a) and Sample 4 (b).

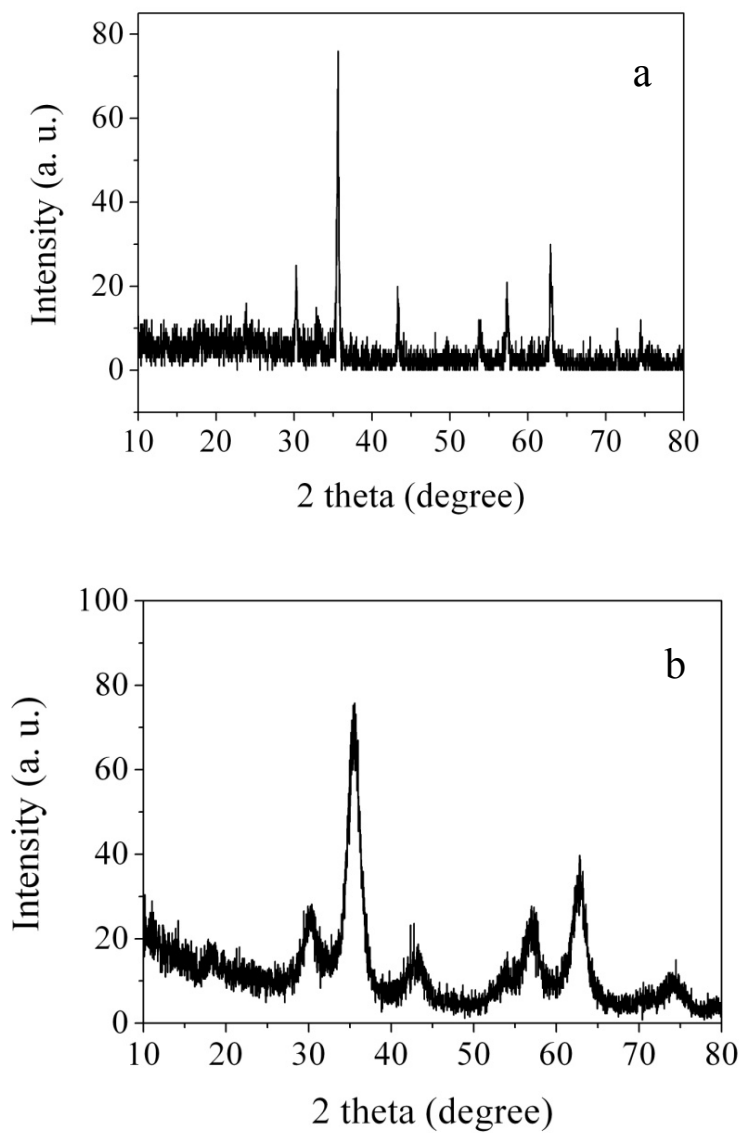

Figure S3. SAED patterns of the  $\text{Fe}_3\text{O}_4$  nanoparticles (a) and  $\alpha\text{-Fe}_2\text{O}_3/\text{Fe}_3\text{O}_4$  core-shell nanostructure (b). The crystalline faces in red color are  $\alpha\text{-Fe}_2\text{O}_3$ .

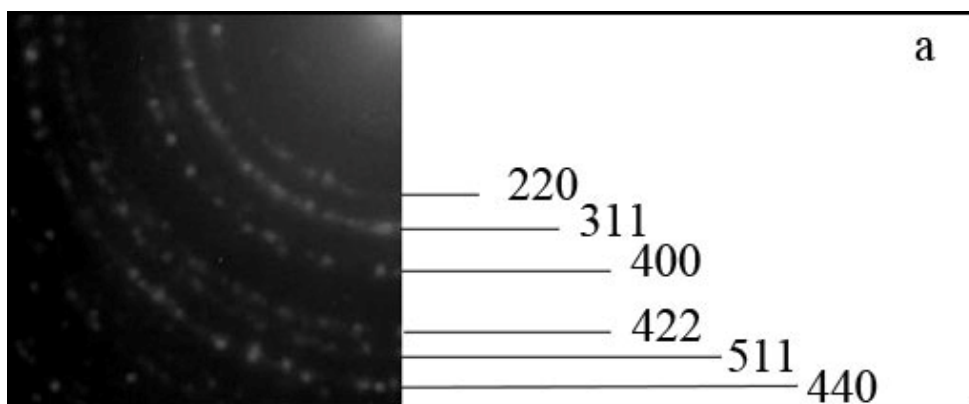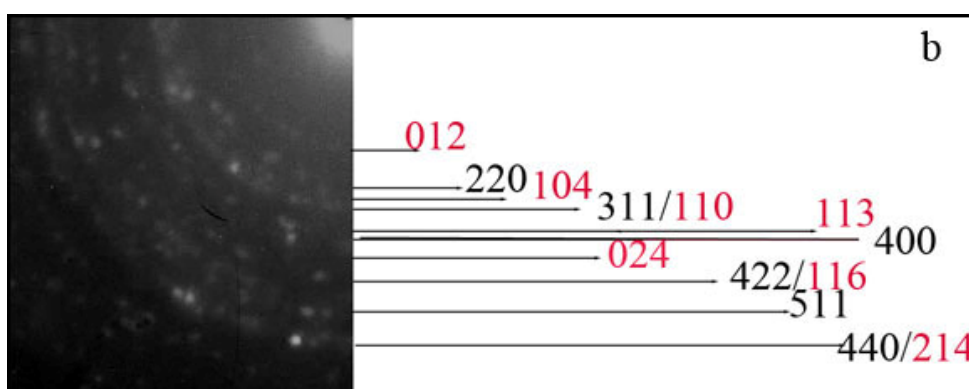

Supplement: f1 [file 837123.f1.pdf]
